# Supplementary material for: Sensitive Diagnosis and Post-Treatment Follow-Up of Schistosoma mansoni Infections in Asymptomatic Eritrean Refugees by Circulating Anodic Antigen Detection and Polymerase Chain Reaction
Source: PubMed Central journal article supplement (PMC8991328; doi:10.4269/ajtmh.21-0803), 2022-02-28
Supplement: tpmd210803.SD1.pdf [file tpmd210803.SD1.pdf]

**Supplemental Table 1.** The level of agreement between CAA, stool PCR and POC-CCA and routine diagnostic tests performed at Swiss TPH (stool sedimentation microscopy and serology) by Cohen's kappa coefficient and McNemar's  $\chi^2$ -test in a group of 92 asymptomatic Eritrean refugees.

| N=92               |                           |          | $\kappa$ | Cohen's kappa<br>Interpretation <sup>1</sup> | <i>p</i> -value | McNemar<br><i>p</i> -value |
|--------------------|---------------------------|----------|----------|----------------------------------------------|-----------------|----------------------------|
| <b>CAA (urine)</b> | <b>Microscopy (stool)</b> |          | 0.440    | Moderate                                     | <i>p</i> <0.001 | <i>p</i> <0.001            |
|                    | Positive                  | Negative |          |                                              |                 |                            |
|                    | 19                        | 21       |          |                                              |                 |                            |
|                    | Positive                  | Negative |          |                                              |                 |                            |
|                    | 3                         | 49       |          |                                              |                 |                            |
| <b>CAA (serum)</b> | <b>Microscopy (stool)</b> |          | 0.540    | Moderate                                     | <i>p</i> <0.001 | <i>p</i> =0.001            |
|                    | Positive                  | Negative |          |                                              |                 |                            |
|                    | 20                        | 17       |          |                                              |                 |                            |
|                    | Positive                  | Negative |          |                                              |                 |                            |
|                    | 2                         | 53       |          |                                              |                 |                            |
| <b>PCR (stool)</b> | <b>Microscopy (stool)</b> |          | 0.735    | Substantial                                  | <i>p</i> <0.001 | <i>p</i> =1.000            |
|                    | Positive                  | Negative |          |                                              |                 |                            |
|                    | 18                        | 5        |          |                                              |                 |                            |
|                    | Positive                  | Negative |          |                                              |                 |                            |
|                    | 4                         | 65       |          |                                              |                 |                            |
| <b>POC-CCA</b>     | <b>Microscopy (stool)</b> |          | 0.618    | Substantial                                  | <i>p</i> <0.001 | <i>p</i> =0.180            |
|                    | Positive                  | Negative |          |                                              |                 |                            |
|                    | 18                        | 10       |          |                                              |                 |                            |
|                    | Positive                  | Negative |          |                                              |                 |                            |
|                    | 4                         | 60       |          |                                              |                 |                            |
| <b>CAA (urine)</b> | <b>Serology</b>           |          | 0.579    | Moderate                                     | <i>p</i> <0.001 | <i>p</i> =1.000            |
|                    | Positive                  | Negative |          |                                              |                 |                            |
|                    | 30                        | 10       |          |                                              |                 |                            |
|                    | Positive                  | Negative |          |                                              |                 |                            |
|                    | 9                         | 43       |          |                                              |                 |                            |
| <b>CAA (serum)</b> | <b>Serology</b>           |          | 0.642    | Substantial                                  | <i>p</i> <0.001 | <i>p</i> =0.804            |
|                    | Positive                  | Negative |          |                                              |                 |                            |
|                    | 30                        | 7        |          |                                              |                 |                            |
|                    | Positive                  | Negative |          |                                              |                 |                            |
|                    | 9                         | 46       |          |                                              |                 |                            |
| <b>PCR (stool)</b> | <b>Serology</b>           |          | 0.529    | Moderate                                     | <i>p</i> <0.001 | <i>p</i> <0.001            |
|                    | Positive                  | Negative |          |                                              |                 |                            |
|                    | 21                        | 2        |          |                                              |                 |                            |
|                    | Positive                  | Negative |          |                                              |                 |                            |
|                    | 18                        | 51       |          |                                              |                 |                            |
| <b>POC-CCA</b>     | <b>Serology</b>           |          | 0.515    | Moderate                                     | <i>p</i> <0.001 | <i>p</i> =0.027            |
|                    | Positive                  | Negative |          |                                              |                 |                            |
|                    | 23                        | 5        |          |                                              |                 |                            |
|                    | Positive                  | Negative |          |                                              |                 |                            |
|                    | 16                        | 48       |          |                                              |                 |                            |

1. Interpretation of  $\kappa$  coefficient:  $\leq 0$ , chance; 0.01-0.20, slight; 0.21-0.40, fair; 0.41-0.60, moderate; 0.61-0.80, substantial; 0.81-0.99, almost perfect.

Abbreviations: CAA, circulating anodic antigen; PCR, polymerase chain reaction; POC-CCA, point-of-care circulating anodic antigen.

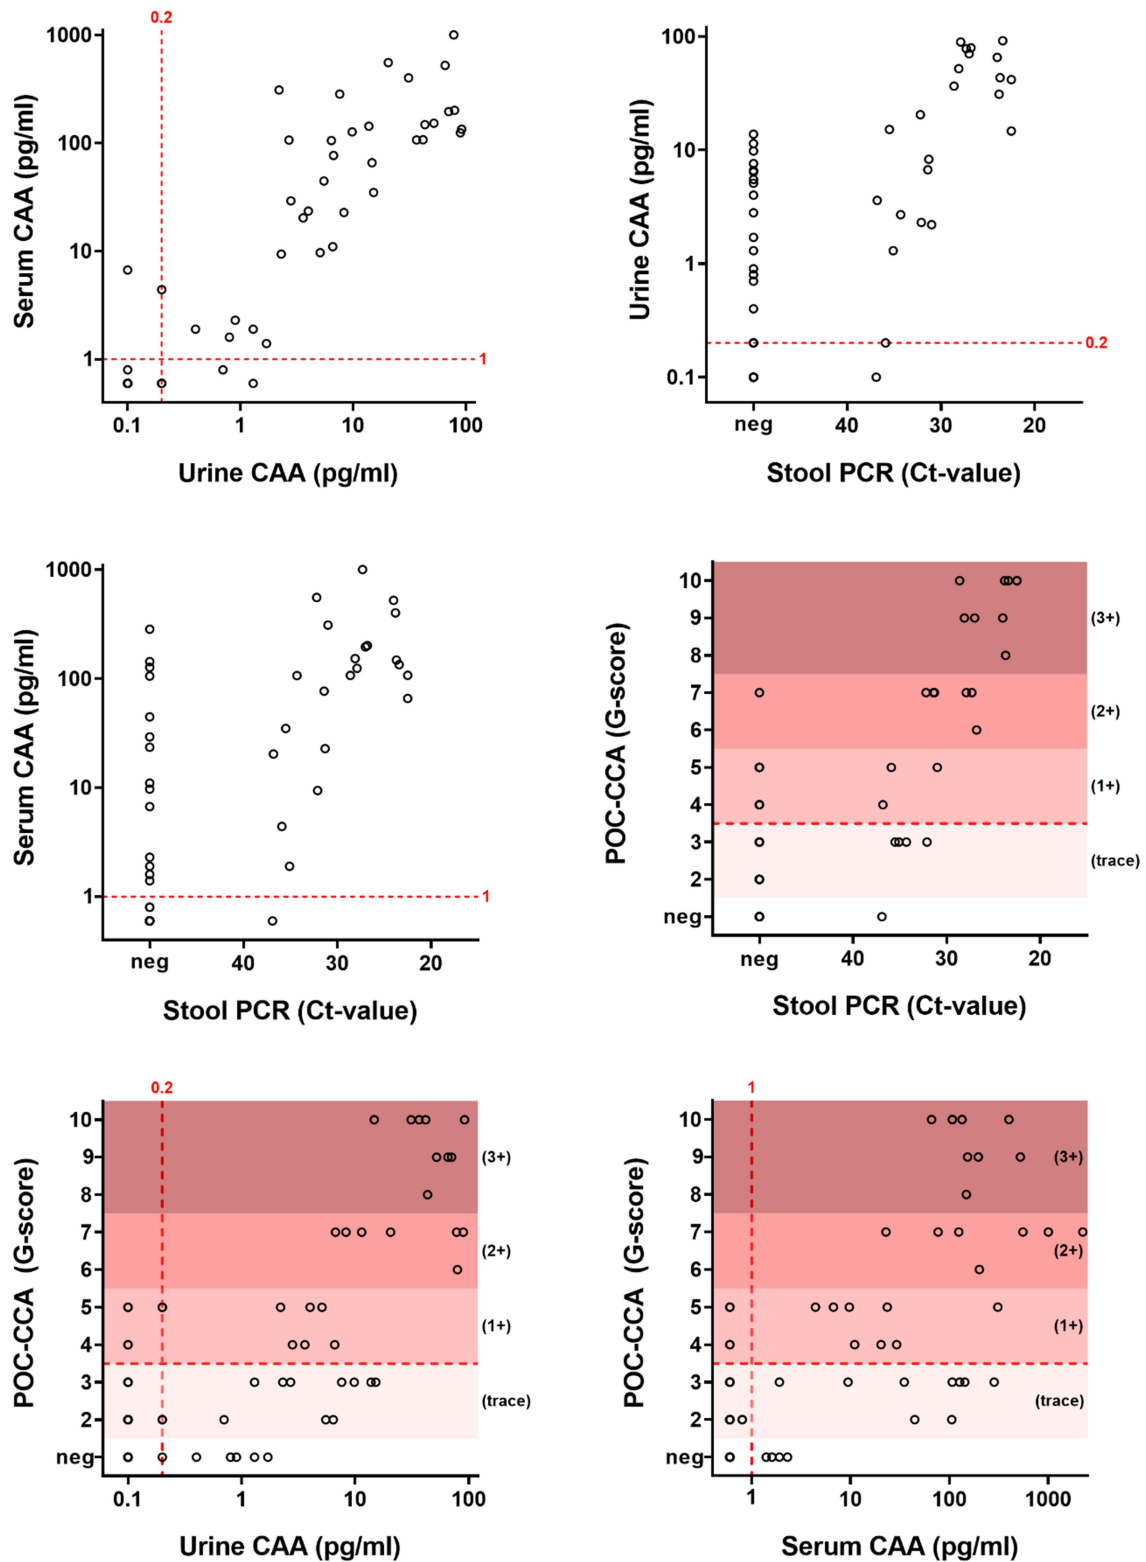

**Supplemental Figure 1.** Pre-treatment correlation between CAA, stool PCR and POC-CCA in a group of 92 asymptomatic Eritrean refugees.

Abbreviations: CAA, circulating anodic antigen; Ct-value, cycle threshold value; PCR, polymerase chain reaction; POC-CCA, point-of-care circulating anodic antigen.

**Supplemental Table 2.** Pre-treatment correlation between CAA, stool PCR and POC-CCA in a group of 92 asymptomatic Eritrean refugees.

| <b>Diagnostic comparison</b> | <b>Spearman's rho<sup>1</sup></b> | <b><i>p</i>-value</b> | <b>Interpretation</b> |
|------------------------------|-----------------------------------|-----------------------|-----------------------|
| Serum CAA vs Urine CAA       | 0.874                             | <i>p</i> <0.01        | Very strong           |
| Urine CAA vs Stool PCR       | -0.659                            | <i>p</i> <0.01        | Strong                |
| Serum CAA vs Stool PCR       | -0.636                            | <i>p</i> <0.01        | Strong                |
| Urine CAA vs POC-CCA         | 0.611                             | <i>p</i> <0.01        | Strong                |
| Serum CAA vs POC-CCA         | 0.683                             | <i>p</i> <0.01        | Strong                |
| POC-CCA vs Stool PCR         | -0.676                            | <i>p</i> <0.01        | Strong                |

1. Interpretation of Spearman's rho:  $\leq 0$ , chance; 0.00 -0.20, negligible; 0.21-0.40, weak; 0.41-0.60, moderate; 0.61-0.80, strong; 0.81-1.00, very strong.

Abbreviations: CAA, circulating anodic antigen; PCR, polymerase chain reaction; POC-CCA, point-of-care circulating anodic antigen.
